# Supplementary material for: Robustness of Ancestral Sequence Reconstruction to Phylogenetic Uncertainty
Source: PubMed Central journal article supplement — Mol Biol Evol. 2010 Apr 5;27(9):1988–99. doi: 10.1093/molbev/msq081 (PMC2922618; doi:10.1093/molbev/msq081), 2010-04-05
Supplement: msq081_1.pdf [file msq081_1.pdf]

# Supplemental Information

February 18, 2010

## Note 1: Notation for the TEB method

Bayes' theorem (Eq. 1) states the posterior probability of a hypothesis  $H$  given data  $D$  equals the conditional probability of  $D$  given  $H$ , weighted by the prior probability of  $H$ , divided by the total probability of the data. (The total probability of the data can also be expressed as the prior-weighted conditional probability of the  $D$  summed over all hypotheses.)

$$P(H|D) = \frac{P(D|H) \times P(H)}{P(D)} = \frac{P(D|H) \times P(H)}{\sum_H P(D|H) \times P(H)} \quad (1)$$

The TEB method for ancestral state reconstruction, described in the section "Materials and Methods" of the main text, applies Bayes' theorem to calculate the posterior probability that some ancestral node contained state  $a$  at a sequence site of interest, given the data  $d$  at that site, an evolutionary model, and its parameters. The TEB posterior probability of ancestral state  $a$  is the weighted average of the posterior probability of  $a$  over all possible trees, with the posterior probability of  $a$  on each tree  $t$  being weighted by the empirical Bayes posterior probability of  $t$ . The empirical Bayes posterior probability  $P_{EB}$  of a tree assumes the maximum likelihood estimate of branch lengths and other model parameters  $\hat{\theta}_t$  on each tree [Kolaczkowski and Thornton, 2008], [Kolaczkowski and Thornton, 2009].

$$P_{TEB}(a|d, m) = \sum_t P(a|d, t, m, \hat{\theta}_t) \times P_{EB}(t|d, m, \hat{\theta}_t) \quad (2)$$

In Eq. 2, the first factor inside the summation is the posterior probability of observing the ancestral state  $a$ , given the data at that site and topology  $t$ . This subexpression can be rewritten using Bayes' theorem:

$$P(a|d, t, m, \hat{\theta}_t) = \frac{P(d|a, t, m, \hat{\theta}_t)\pi_a}{\sum_a P(d|a, t, m, \hat{\theta}_t)\pi_a} = \frac{P(d|a, t, m, \hat{\theta}_t)\pi_a}{P(d|t, m, \hat{\theta}_t)} \quad (3)$$

where  $\pi_a$  is the prior probability of hypothesis  $a$ , defined as the equilibrium state frequency of state  $a$ .

The second factor inside the summation of Eq. 2 is the empirical Bayes posterior probability of tree  $t$ , given the data at the site of interest. We use Bayes' theorem to rewrite this subexpression:

$$P_{EB}(t|d, m, \hat{\theta}_t) = \frac{P(d|t, m, \hat{\theta}_t)P(t)}{\sum_t P(d|t, m, \hat{\theta}_t)P(t)} \quad (4)$$

We can use Equations 3 and 4 to expand Eq. 2 as follows:

$$P_{TEB}(a|d, m) = \sum_t \left[ \frac{P(d|a, t, m, \hat{\theta}_t)\pi_a}{P(d|t, m, \hat{\theta}_t)} \times \frac{P(d|t, m, \hat{\theta}_t)P(t)}{\sum_t P(d|t, m, \hat{\theta}_t)P(t)} \right] \quad (5)$$

The product of fractions in Eq. 5 can be simplified by canceling like factors in numerator and denominator:

$$P_{TEB}(a|d, m) = \sum_t \left[ \frac{P(d|a, t, m, \hat{\theta}_t)\pi_a \times P(t)}{\sum_t P(d|t, m, \hat{\theta}_t)P(t)} \right] \quad (6)$$

$$= \frac{\sum_t P(d|a, t, m, \hat{\theta}_t)\pi_a P(t)}{\sum_t P(d|t, m, \hat{\theta}_t)P(t)} \quad (7)$$

The denominator in Eq. 7 can be rewritten as as the total probability of the data given the maximum likelihood model parameters on each tree, summed over all possible ancestral states for  $a$ :

$$\sum_t P(d|t, m, \hat{\theta}_t)P(t) = \sum_t \sum_a P(d|a, t, m, \hat{\theta}_t)\pi_a P(t) \quad (8)$$

Substituting, we have

$$P_{TEB}(a|d, m) = \frac{\sum_t P(d|a, t, m, \hat{\theta}_t)\pi_a P(t)}{\sum_t \sum_a P(d|a, t, m, \hat{\theta}_t)\pi_a P(t)} \quad (9)$$

Eq. 9 formulates the TEB method in form similar to that used by [Pagel et al., 2004], [Huelsenbeck and Bollback, 2001].

| extant state pattern | clade correct | mem. +       | mem. -       | all          |
|----------------------|---------------|--------------|--------------|--------------|
| all: ML              | <b>10.201</b> | 4.823        | 3.344        | <b>9.439</b> |
| all: EB              | 17.762        | <b>2.191</b> | <b>2.532</b> | 14.896       |
| xxx: ML              | <b>0.051</b>  | 0.002        | 0.001        | <b>0.037</b> |
| xxx: EB              | 0.275         | <b>0.001</b> | 0.001        | 0.141        |
| xyx: ML              | <b>2.014</b>  | 0.081        | 0.081        | <b>3.022</b> |
| xyx: EB              | 14.210        | <b>0.013</b> | <b>0.024</b> | 17.835       |
| xyy: ML              | 1.809         | <b>0.209</b> | 0.464        | <b>1.676</b> |
| xyy: EB              | <b>1.565</b>  | 0.464        | <b>0.274</b> | 2.109        |
| yxx: ML              | 2.645         | <b>0.062</b> | 0.214        | <b>4.766</b> |
| yxx: EB              | <b>2.630</b>  | 0.081        | <b>0.205</b> | 5.355        |
| xyz: ML              | <b>10.347</b> | 4.475        | <b>2.333</b> | <b>7.839</b> |
| xyz: EB              | 19.703        | <b>1.597</b> | 2.568        | 15.317       |

Table 1:  $\chi^2$  statistics for the ultrametric four-taxon simulation measures the fit between the function  $f(x) = y$  and the points in published Figure 7 of the main text. The chi-square calculation is weighted because the bins (along the X axis) each contain different numbers of inferences; some bins contain more than 10,000 state predictions, while other bins contain less than 100 predictions. We

calculated the weighted chi-square statistic as follows:  $\chi^2 = \sum_{i=1}^n \frac{B_i(O_i - E_i)^2}{E_i}$ ,

where  $n$  is the number of bins,  $B_i$  is the number of inferences within bin  $i$ ,  $O_i$  is the observed proportion of correct inferences for bin  $i$ , and  $E_i$  is the expected proportion of correct inferences for bin  $i$ . Lower  $\chi^2$  scores correspond to more accurate posterior probability values. In this table, every ancestral state inferences from every replicate was sorted according to the same criteria in published Figure 4B of the main text. The top row expresses  $\chi^2$  values across all descendant state patterns. The right-most column express  $\chi^2$  values across all membership patterns.

## References

- [Huelsenbeck and Bollback, 2001] Huelsenbeck, J. P. and Bollback, J. P. (2001). Empirical and heirarchical bayesian estimation of ancestral states. *Systematic Biology*, 50(3):351–366.
- [Kolaczkowski and Thornton, 2008] Kolaczkowski, B. and Thornton, J. W. (2008). A mixed branch length model of heterotachy improves phylogenetic accuracy. *Molecular Biology and Evolution*, 25(6):1054–1066.
- [Kolaczkowski and Thornton, 2009] Kolaczkowski, B. and Thornton, J. W. (2009). Long-branch attraction bias and inconsistency in bayesian phylogenetics. *PLoS ONE*, 4(12):e7891.

| extant state pattern | all    | clade correct | mem. + | mem. - |
|----------------------|--------|---------------|--------|--------|
| all                  | 1.0000 | 0.6770        | 0.1613 | 0.1617 |
| xxx                  | 0.3098 | 0.2280        | 0.0399 | 0.0421 |
| xxy                  | 0.1864 | 0.1330        | 0.0273 | 0.0261 |
| xyx                  | 0.1324 | 0.0848        | 0.0233 | 0.0243 |
| yxx                  | 0.1324 | 0.0849        | 0.0239 | 0.0237 |
| xyz                  | 0.2390 | 0.1464        | 0.0460 | 0.0466 |

Table 2: The proportion of sites from the ultrametric four-taxon simulations that exhibit particular state patterns and descendant membership patterns. The data is binned according to rows and columns as described in Figure 8C of the main text.

| Node          | $\chi^2$     | PP(node) |
|---------------|--------------|----------|
| 62: ML        | 2.032        | 0.65     |
| 62: EB        | <b>1.699</b> |          |
| 63: ML        | 4.547        | 1.00     |
| 63: EB        | <b>3.198</b> |          |
| 64: ML        | 2.820        | 1.00     |
| 64: EB        | <b>2.690</b> |          |
| 82: ML        | <b>3.967</b> | 1.00     |
| 82: EB        | 6.525        |          |
| 88: ML        | 0.201        | 0.94     |
| 88: EB        | <b>0.082</b> |          |
| 89: ML        | 0.573        | 0.72     |
| 89: EB        | <b>0.061</b> |          |
| 90: ML        | 0.024        | 0.99     |
| 90: EB        | <b>0.023</b> |          |
| 94: ML        | <b>0.428</b> | 1.00     |
| 94: EB        | 1.310        |          |
| 95: ML        | <b>0.758</b> | 0.75     |
| 95: EB        | 1.953        |          |
| 104: ML       | <b>0.874</b> | 0.98     |
| 104: EB       | 1.044        |          |
| 118: ML       | <b>0.842</b> | 1.00     |
| 118: EB       | 1.051        |          |
| All nodes: ML | <b>4.169</b> |          |
| All nodes: EB | 4.477        |          |

Table 3:  $\chi^2$  statistics for the steroid-hormone simulation.  $\chi^2$  values were calculated as described for Table 1. Lower  $\chi^2$  scores correspond to more accurate ASR posterior probability values. The left-most column lists node numbers corresponding to phylogenetic labels in figure 2 of the main text. The right-most column lists the posterior probability (PP) of the corresponding node.

| <b>Node</b> | $\chi^2$     | <b>PP(node)</b> |
|-------------|--------------|-----------------|
| 33: ML      | <b>2.536</b> | 0.61            |
| 33: EB      | 3.463        |                 |
| 36: ML      | 6.939        | 0.87            |
| 36: EB      | <b>2.989</b> |                 |
| 37: ML      | <b>7.682</b> | 1.00            |
| 37: EB      | 8.871        |                 |
| 38: ML      | 2.477        | 0.74            |
| 38: EB      | <b>2.063</b> |                 |
| 39: ML      | <b>2.827</b> | 0.42            |
| 39: EB      | 2.921        |                 |
| 40: ML      | 1.909        | 1.00            |
| 40: EB      | <b>1.385</b> |                 |
| 41: ML      | <b>3.606</b> | 1.00            |
| 41: EB      | 3.725        |                 |
| 42: ML      | <b>3.989</b> | 1.00            |
| 42: EB      | 4.281        |                 |
| 47: ML      | <b>6.129</b> | 0.83            |
| 47: EB      | 6.137        |                 |
| 48: ML      | 4.496        | 0.45            |
| 48: EB      | <b>3.377</b> |                 |
| 52: ML      | <b>7.255</b> | 1.00            |
| 52: EB      | 7.644        |                 |

Table 4:  $\chi^2$  statistics for the ADH simulation.  $\chi^2$  values were calculated as described for Table 1. Lower  $\chi^2$  scores correspond to more accurate ASR posterior probability values. The left-most column lists node numbers corresponding to phylogenetic labels in figure 3 of the main text. The right-most column lists the posterior probability (PP) of the corresponding node.

| Node          | $\chi^2$     | PP(node) |
|---------------|--------------|----------|
| 54: ML        | <b>6.471</b> | 0.62     |
| 54: EB        | 8.928        |          |
| 55: ML        | <b>3.976</b> | 0.9      |
| 55: EB        | 5.163        |          |
| 74: ML        | <b>0.015</b> | 0.98     |
| 74: EB        | 0.017        |          |
| 75: ML        | 0.016        | 0.36     |
| 75: EB        | 0.016        |          |
| 78: ML        | 0.062        | 0.99     |
| 78: EB        | <b>0.047</b> |          |
| 79: ML        | <b>0.051</b> | 0.2      |
| 79: EB        | 0.057        |          |
| 95: ML        | <b>3.772</b> | –        |
| 95: EB        | 4.033        |          |
| All nodes: ML | <b>6.282</b> |          |
| All nodes: EB | 7.746        |          |

Table 5:  $\chi^2$  statistics for the GFP simulation.  $\chi^2$  values were calculated as described for Table 1. Lower  $\chi^2$  scores correspond to more accurate ASR posterior probability values. The left-most column lists node numbers corresponding to phylogenetic labels in figure 4 of the main text. The right-most column lists the posterior probability (PP) of the corresponding node.

[Pagel et al., 2004] Pagel, M., Meade, A., and Barker, D. (2004). Bayesian estimation of ancestral character states on phylogenies. *Systematic Biology*, 53(5):673–684.

| Node          | $\chi^2$     | PP(node) |
|---------------|--------------|----------|
| 54: ML        | 1.018        | 0.99     |
| 54: EB        | 1.131        |          |
| 98: ML        | 0.016        | 1.0      |
| 98: EB        | 0.015        |          |
| 55: ML        | 0.099        | 0.29     |
| 55: EB        | 0.103        |          |
| 56: ML        | 0.077        | 0.02     |
| 56: EB        | 0.063        |          |
| 92: ML        | 0.247        | 0.99     |
| 92: EB        | 0.247        |          |
| 93: ML        | 0.275        | 0.99     |
| 93: EB        | 0.275        |          |
| 91: ML        | 0.007        | 0.73     |
| 91: EB        | 0.007        |          |
| 90: ML        | 0.260        | 1.0      |
| 90: EB        | 0.260        |          |
| 57: ML        | 0.018        | 0.37     |
| 57: EB        | 0.018        |          |
| 59: ML        | 0.187        | 0.45     |
| 59: EB        | 0.194        |          |
| 76: ML        | 0.000        | 0.69     |
| 76: EB        | 0.000        |          |
| 75: ML        | 0.000        | 1.0      |
| 75: EB        | 0.000        |          |
| 69: ML        | 0.011        | 0.33     |
| 69: EB        | 0.011        |          |
| 68: ML        | 0.039        | –        |
| 68: EB        | 0.039        |          |
| 65: ML        | 0.137        | 1.0      |
| 65: EB        | 0.137        |          |
| 66: ML        | 0.513        | 0.23     |
| 66: EB        | 0.513        |          |
| 64: ML        | 0.101        | –        |
| 64: EB        | 0.098        |          |
| 88: ML        | 5.265        | 1.0      |
| 88: EB        | 5.388        |          |
| 89: ML        | 1.012        | 1.0      |
| 89: EB        | 1.012        |          |
| 87: ML        | 3.771        | 0.69     |
| 87: EB        | 3.854        |          |
| 86: ML        | 1.689        | 0.99     |
| 86: EB        | 1.657        |          |
| All nodes: ML | <b>4.448</b> |          |
| All nodes: EB | 4.465        |          |

Table 6:  $\chi^2$  statistics for the EF-Tu simulation.  $\chi^2$  values were calculated as described for Table 1. Lower  $\chi^2$  scores correspond to more accurate ASR posterior probability values. The left-most column lists node numbers corresponding to phylogenetic labels in figure 5 of the main text. The right-most column lists the posterior probability (PP) of the corresponding node.



| <b>Simulation</b>          | $n$  | $j$ | df   | T-value  | P-value |
|----------------------------|------|-----|------|----------|---------|
| ultrametric four-taxon     | 3200 | 2   | 6399 | -0.06911 | 0.9449  |
| non-ultrametric four-taxon | 1000 | 2   | 1999 | -0.07420 | 0.9409  |
| ADH                        | 100  | 12  | 1199 | -0.07997 | 0.9363  |
| steroid hormone receptor   | 100  | 12  | 1199 | -0.08099 | 0.9355  |
| EF-Tu                      | 100  | 28  | 2799 | -0.07161 | 0.9428  |
| GFP                        | 100  | 14  | 1399 | -0.07540 | 0.9399  |

Table 7: T-values testing the hypothesis that the mean accuracy of the ML method is significantly different than the mean accuracy of the TEB method. The column titled  $n$  shows the number of replicates,  $j$  shows the number of ancestral nodes reconstructed on the given phylogeny, and  $df$  shows the degrees of freedom (calculated as  $n \times j$ ). The column titled  $T$ -value shows the result of a paired two-sample T test. T-values were computed as the mean of paired differences among replicates, divided by the standard error of the mean of paired differences. The column titled  $P$ -value shows the statistical significance of the corresponding T value.
